# Supplementary material
Source: PubMed Central journal article supplement (PMC4185004)
Supplement: NIHMS625636-supplement.pdf [file NIHMS625636-supplement.pdf]

# Figure S1

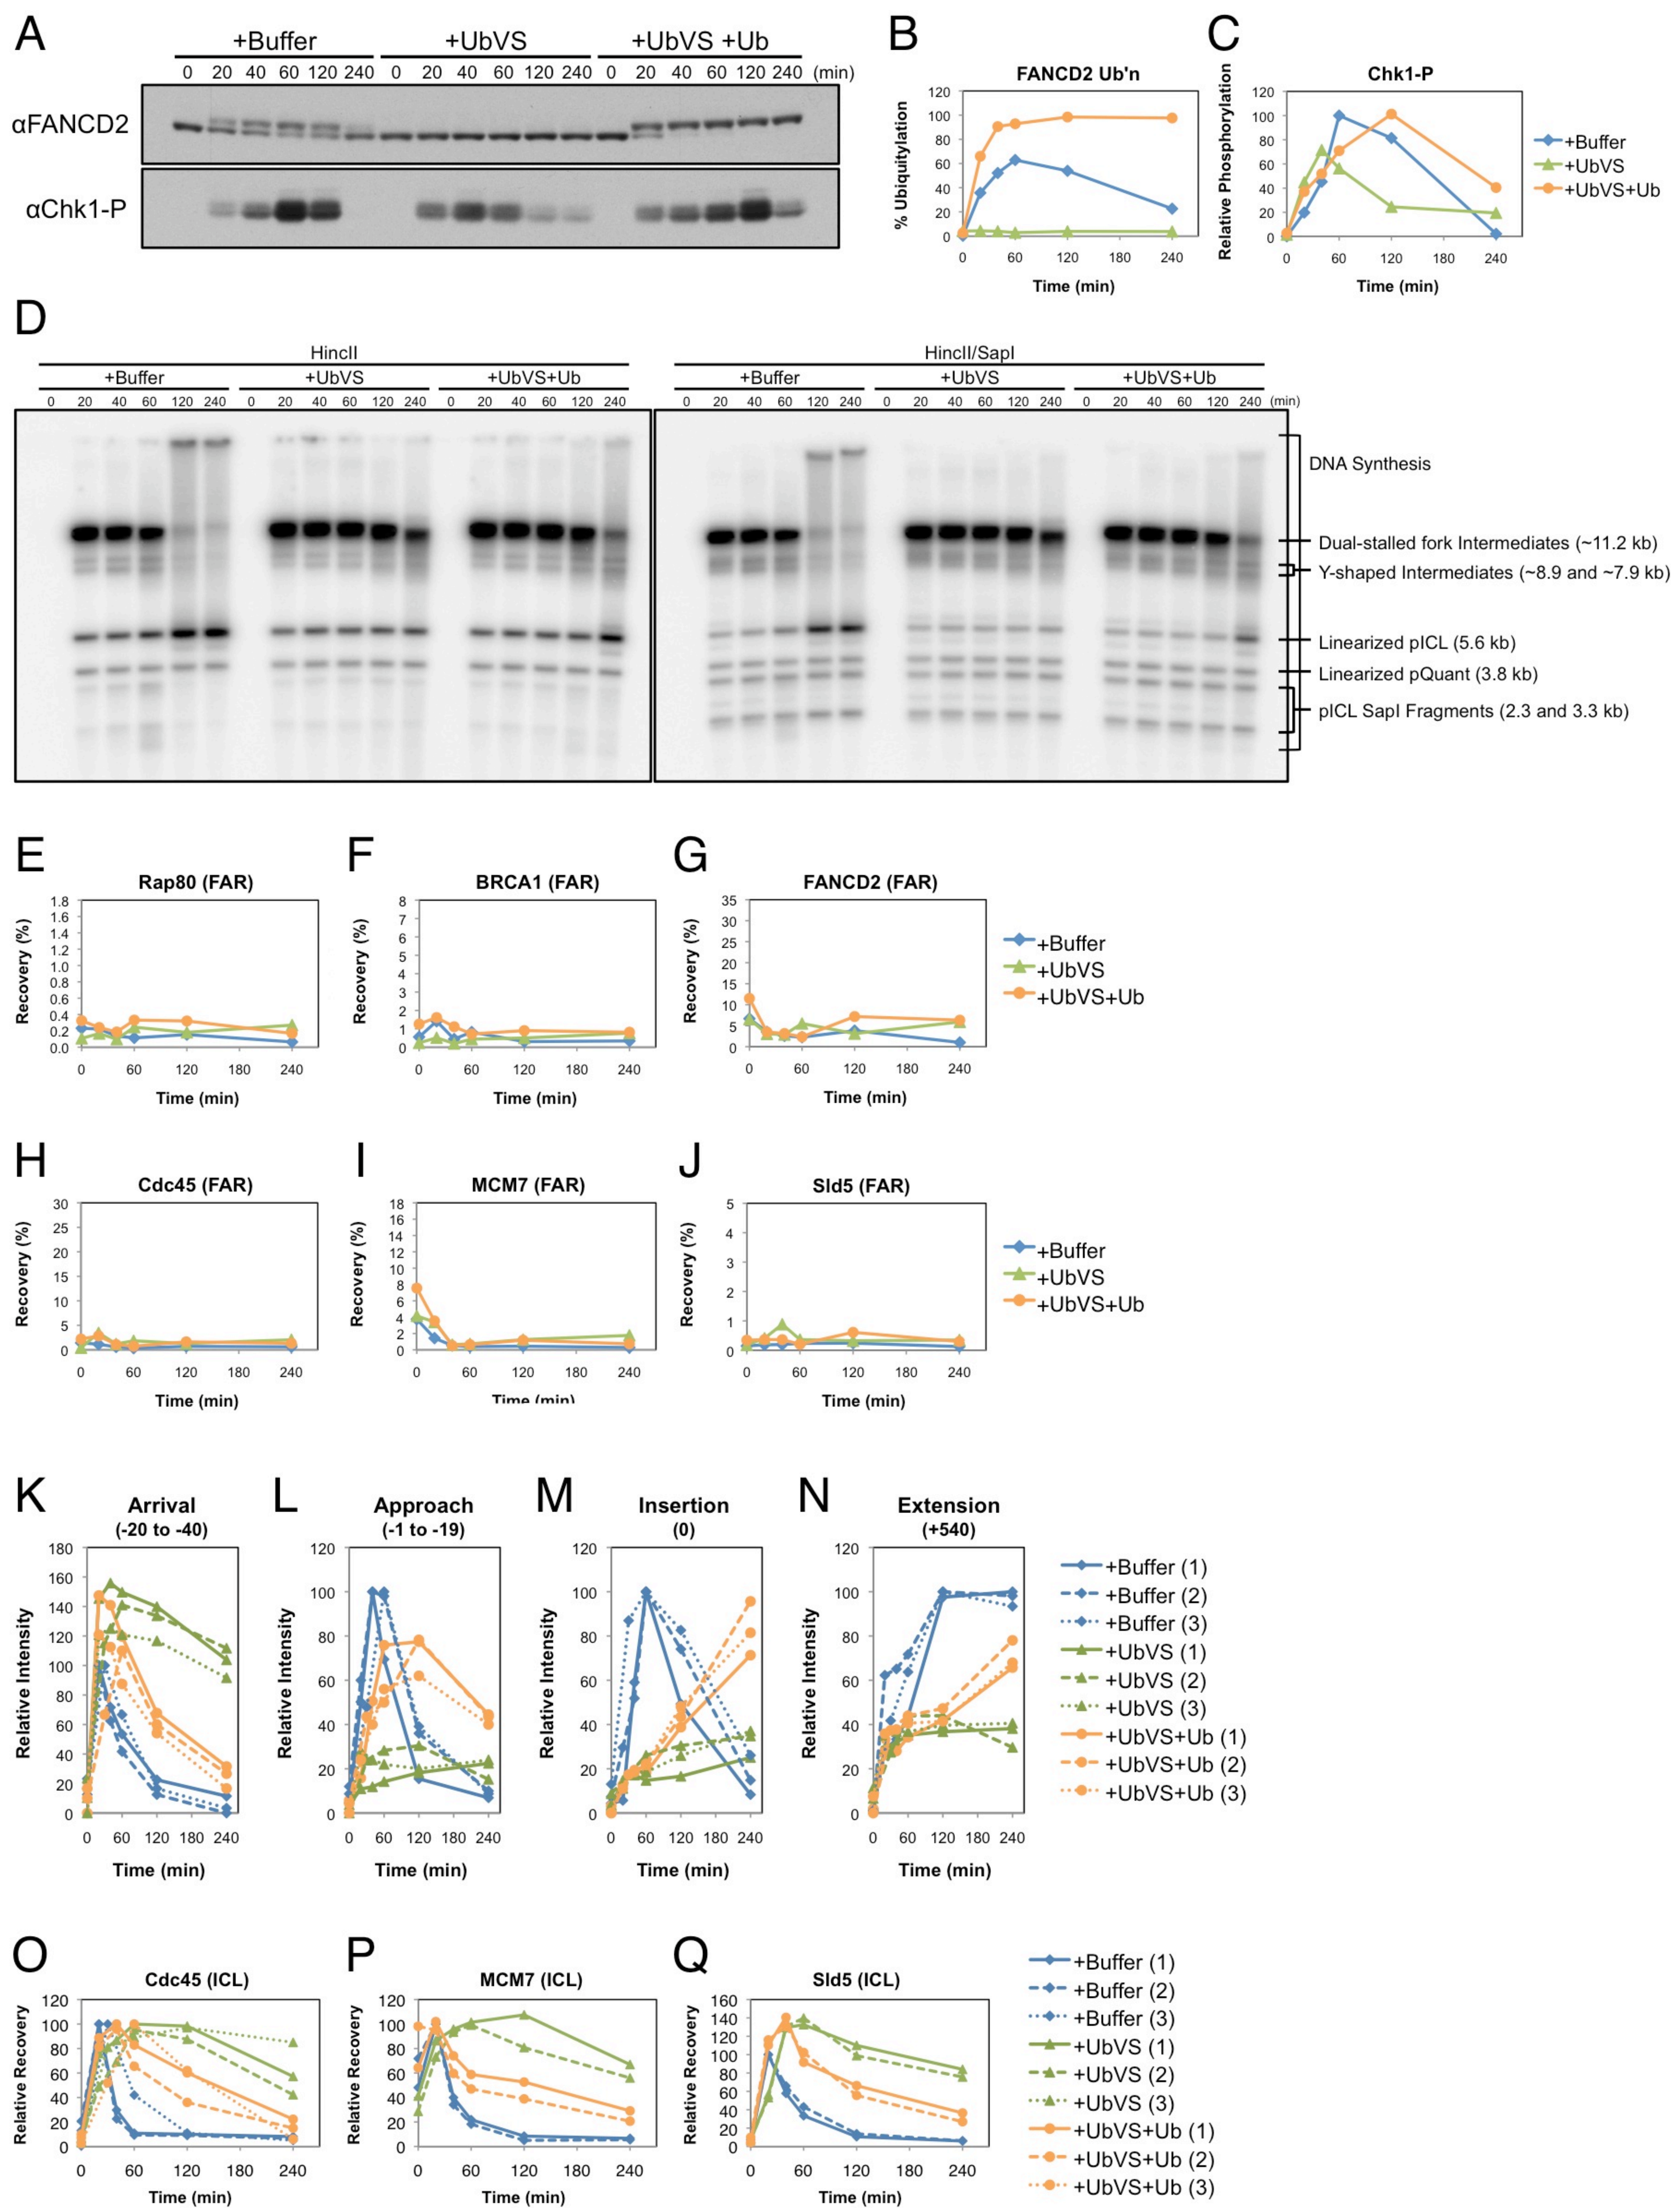



# Figure S2

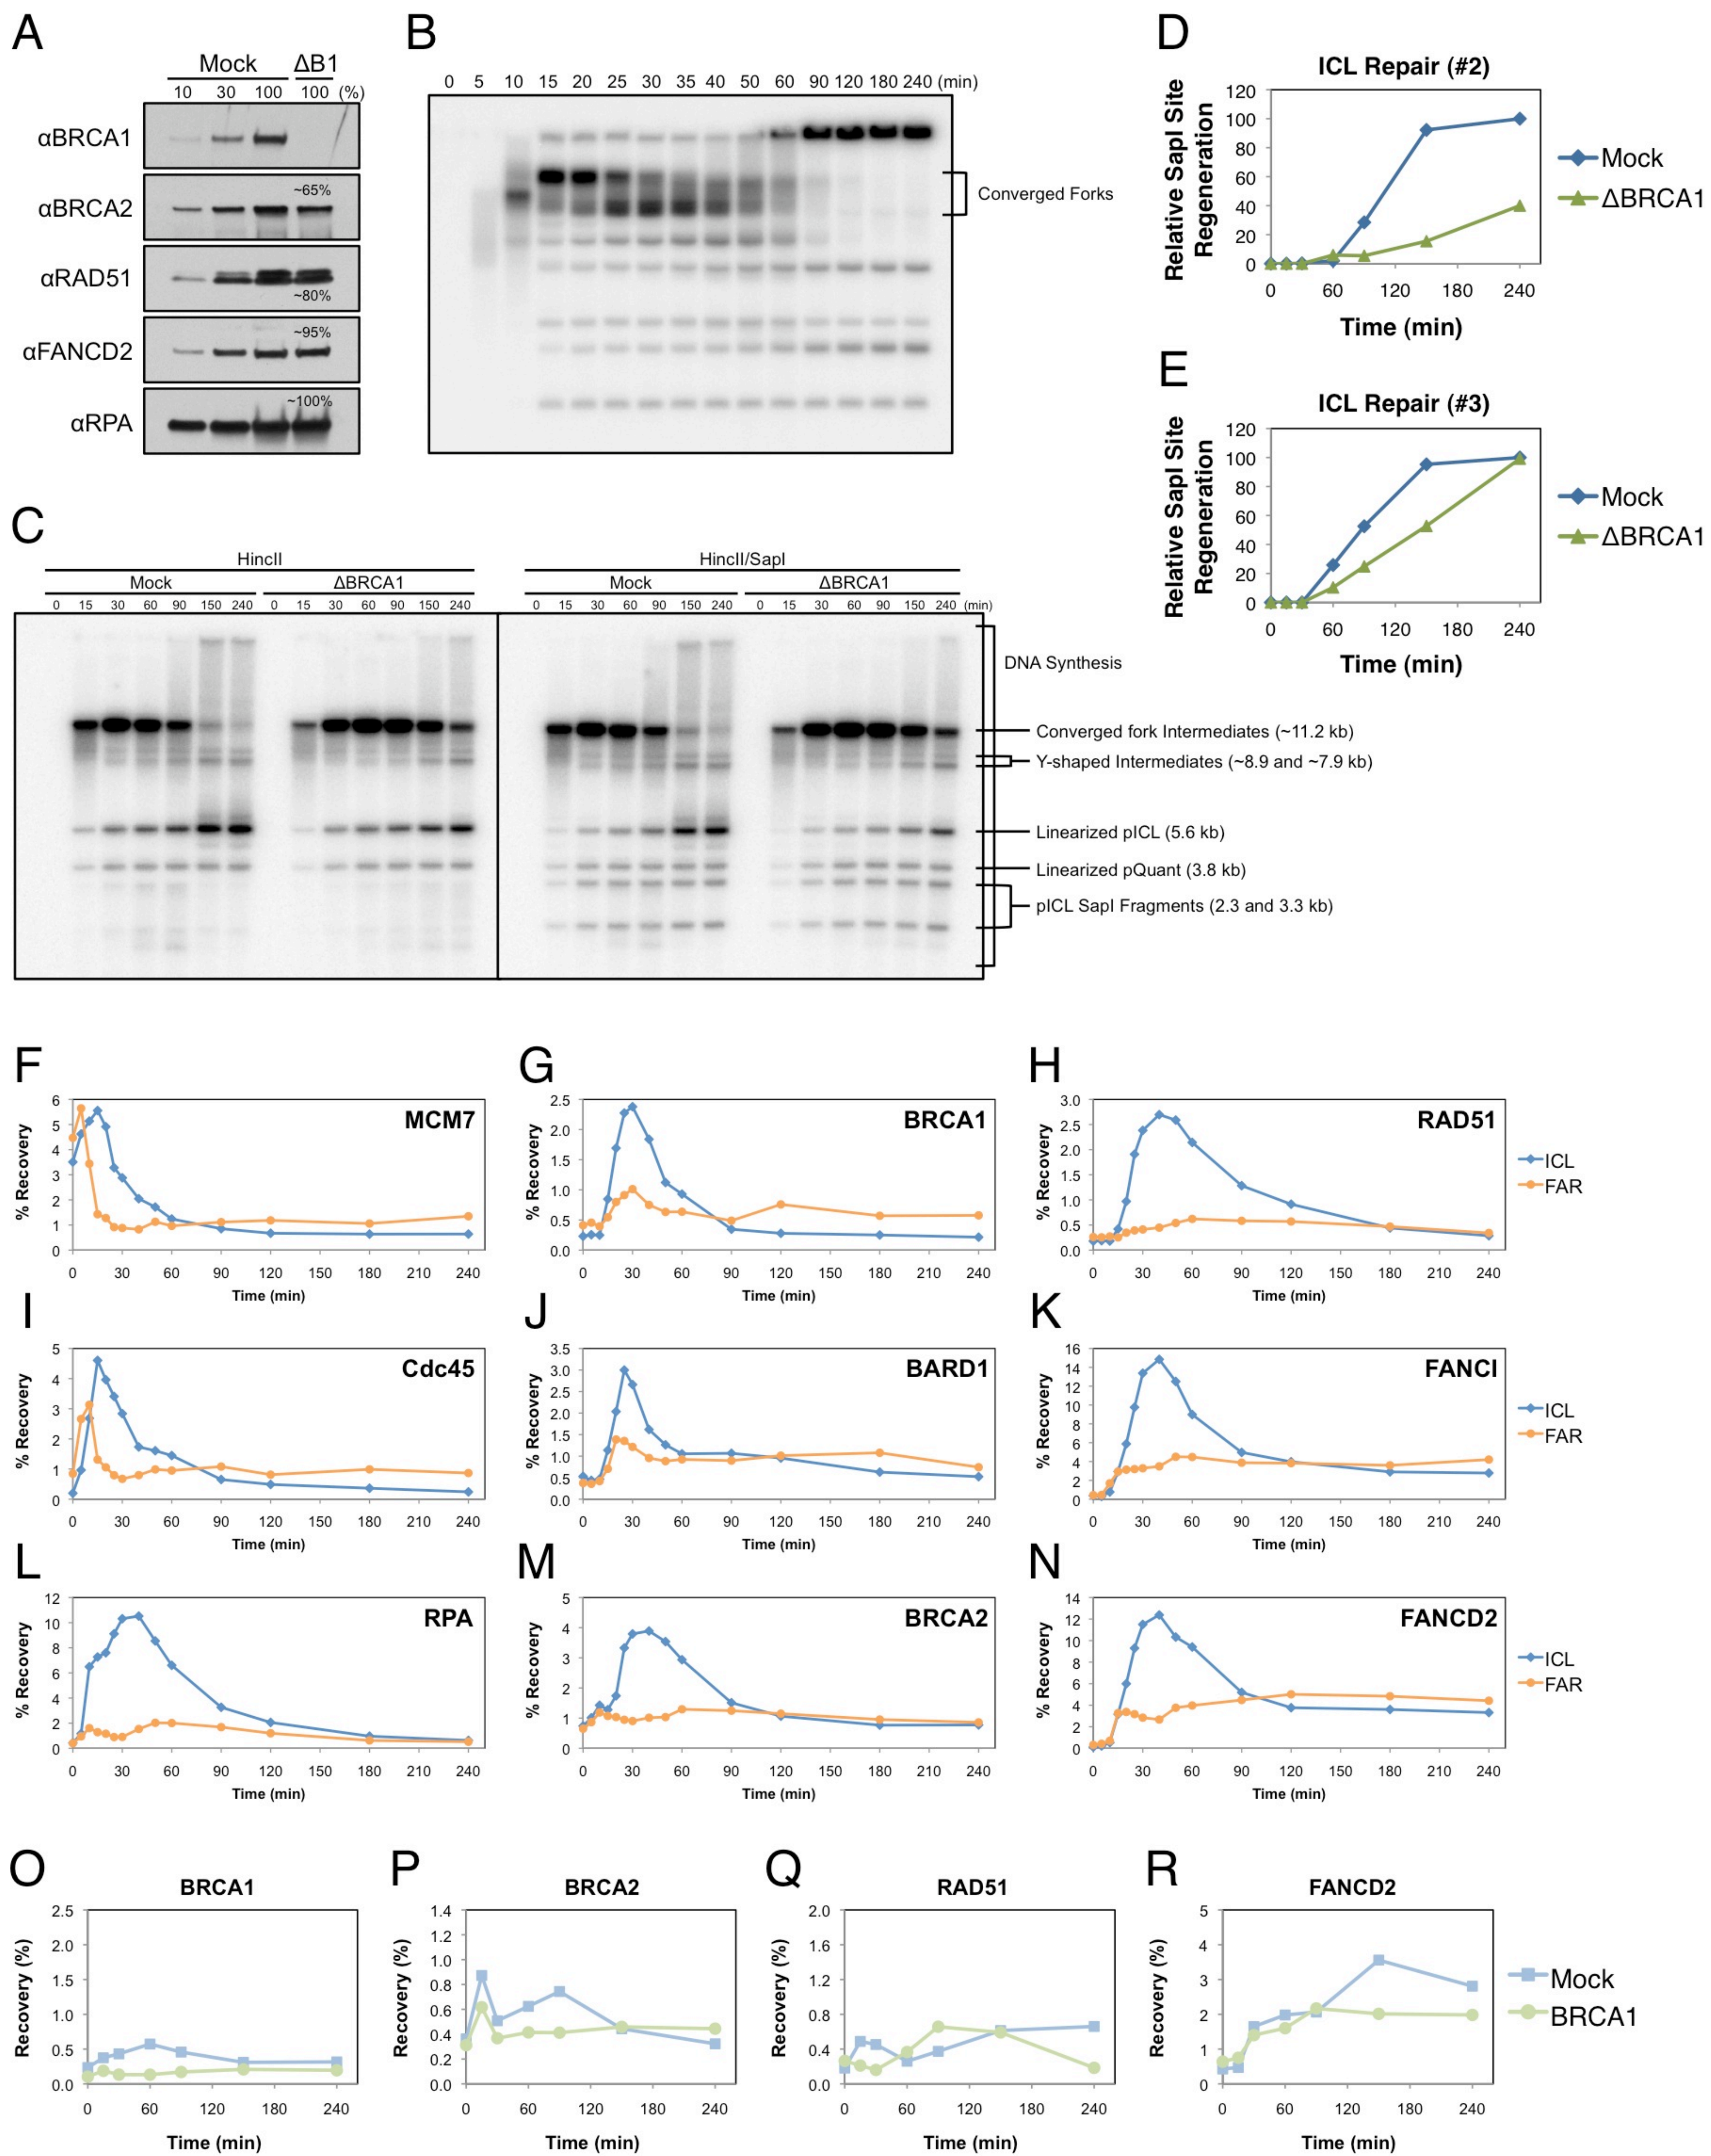



# Figure S3

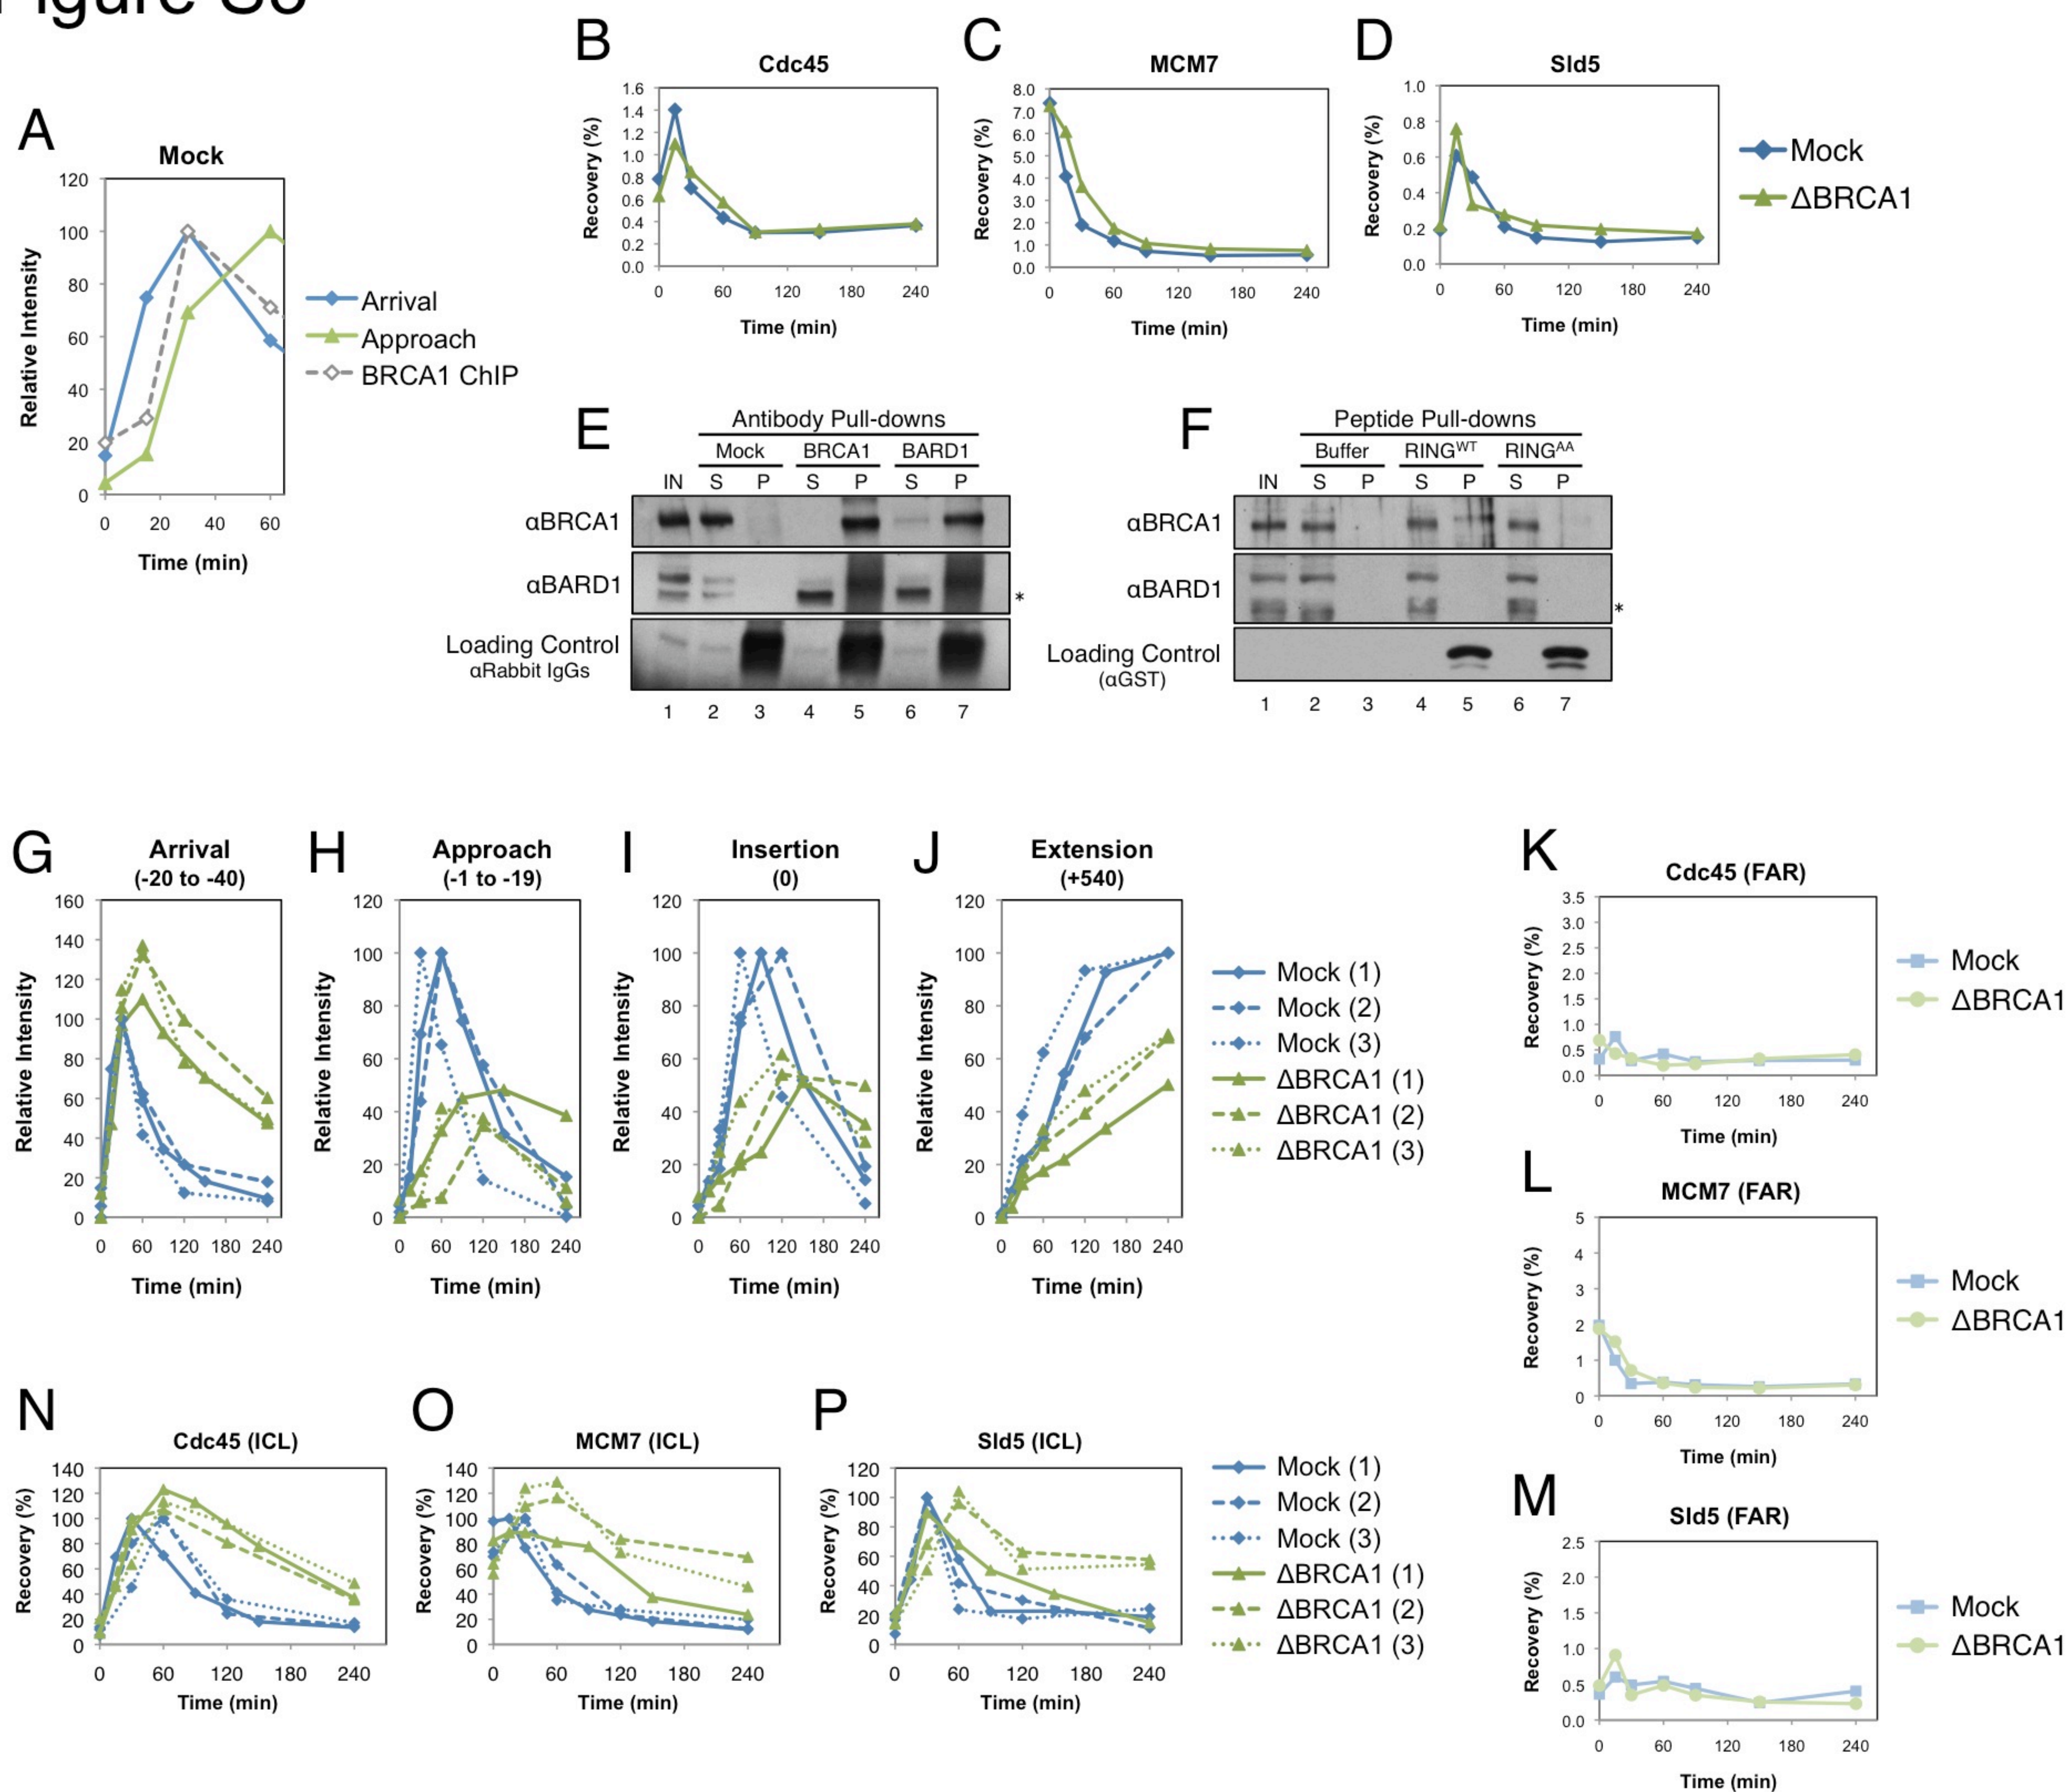



# Figure S4

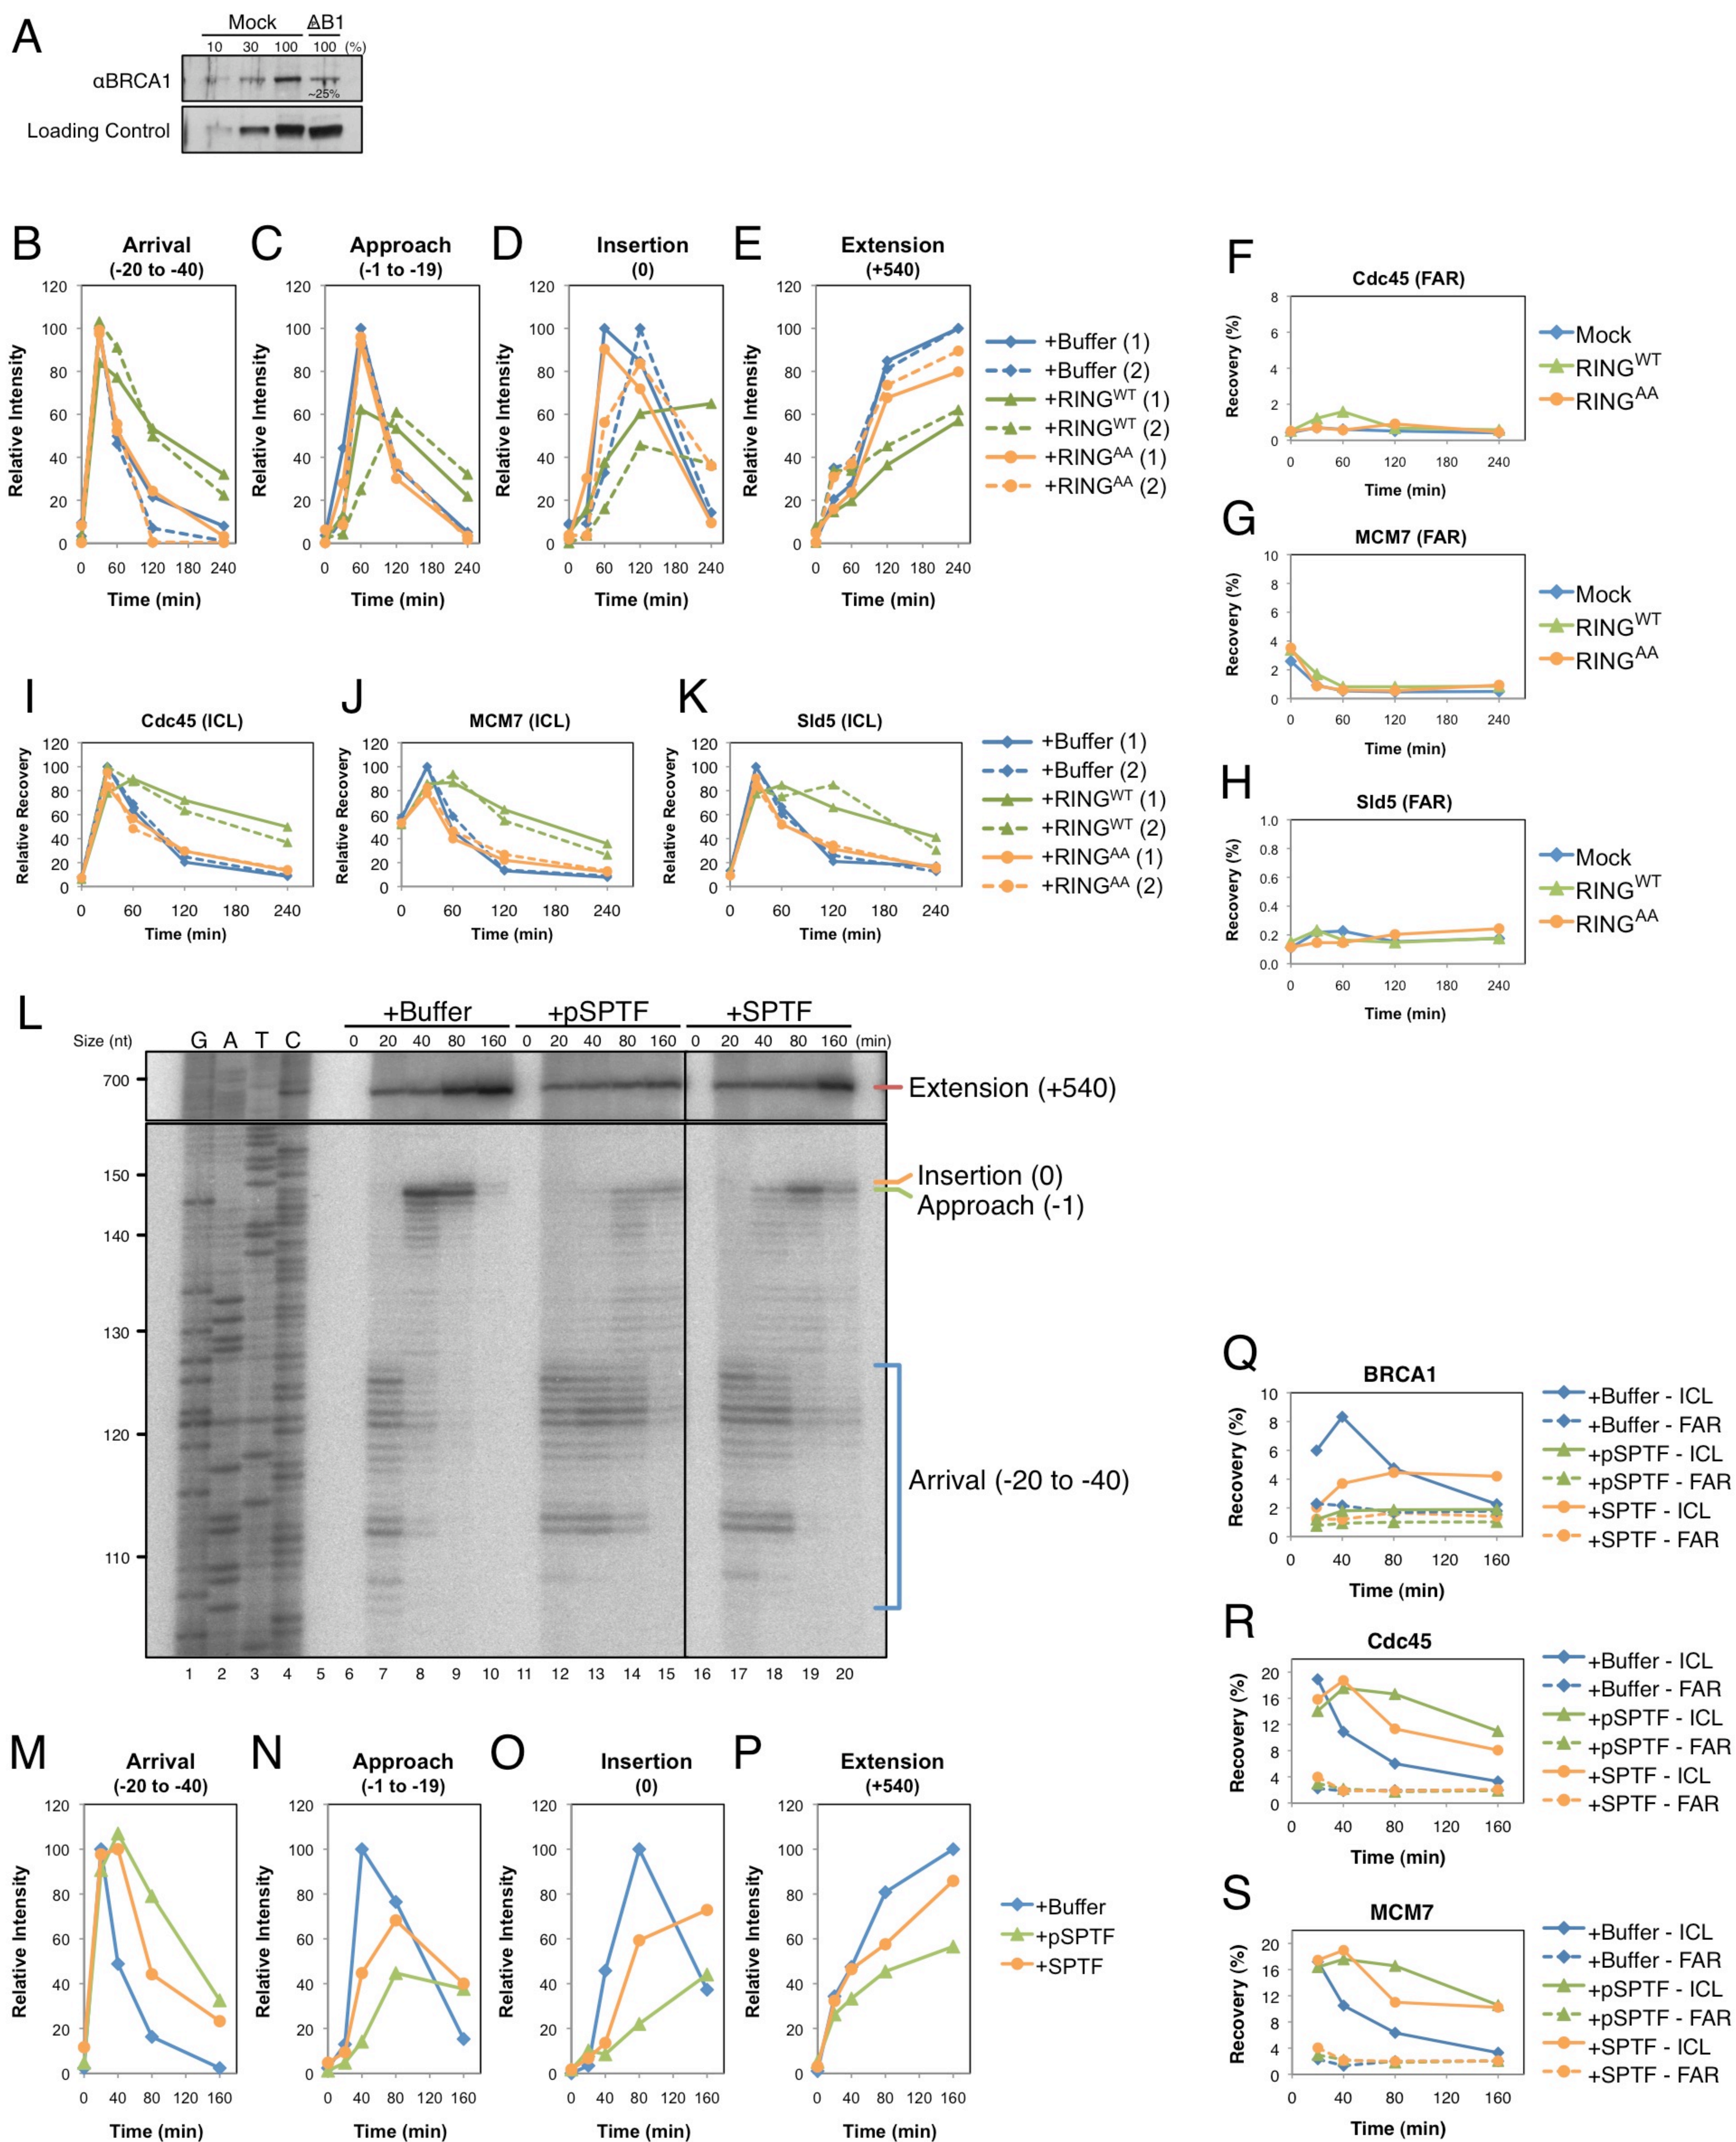



# Figure S5

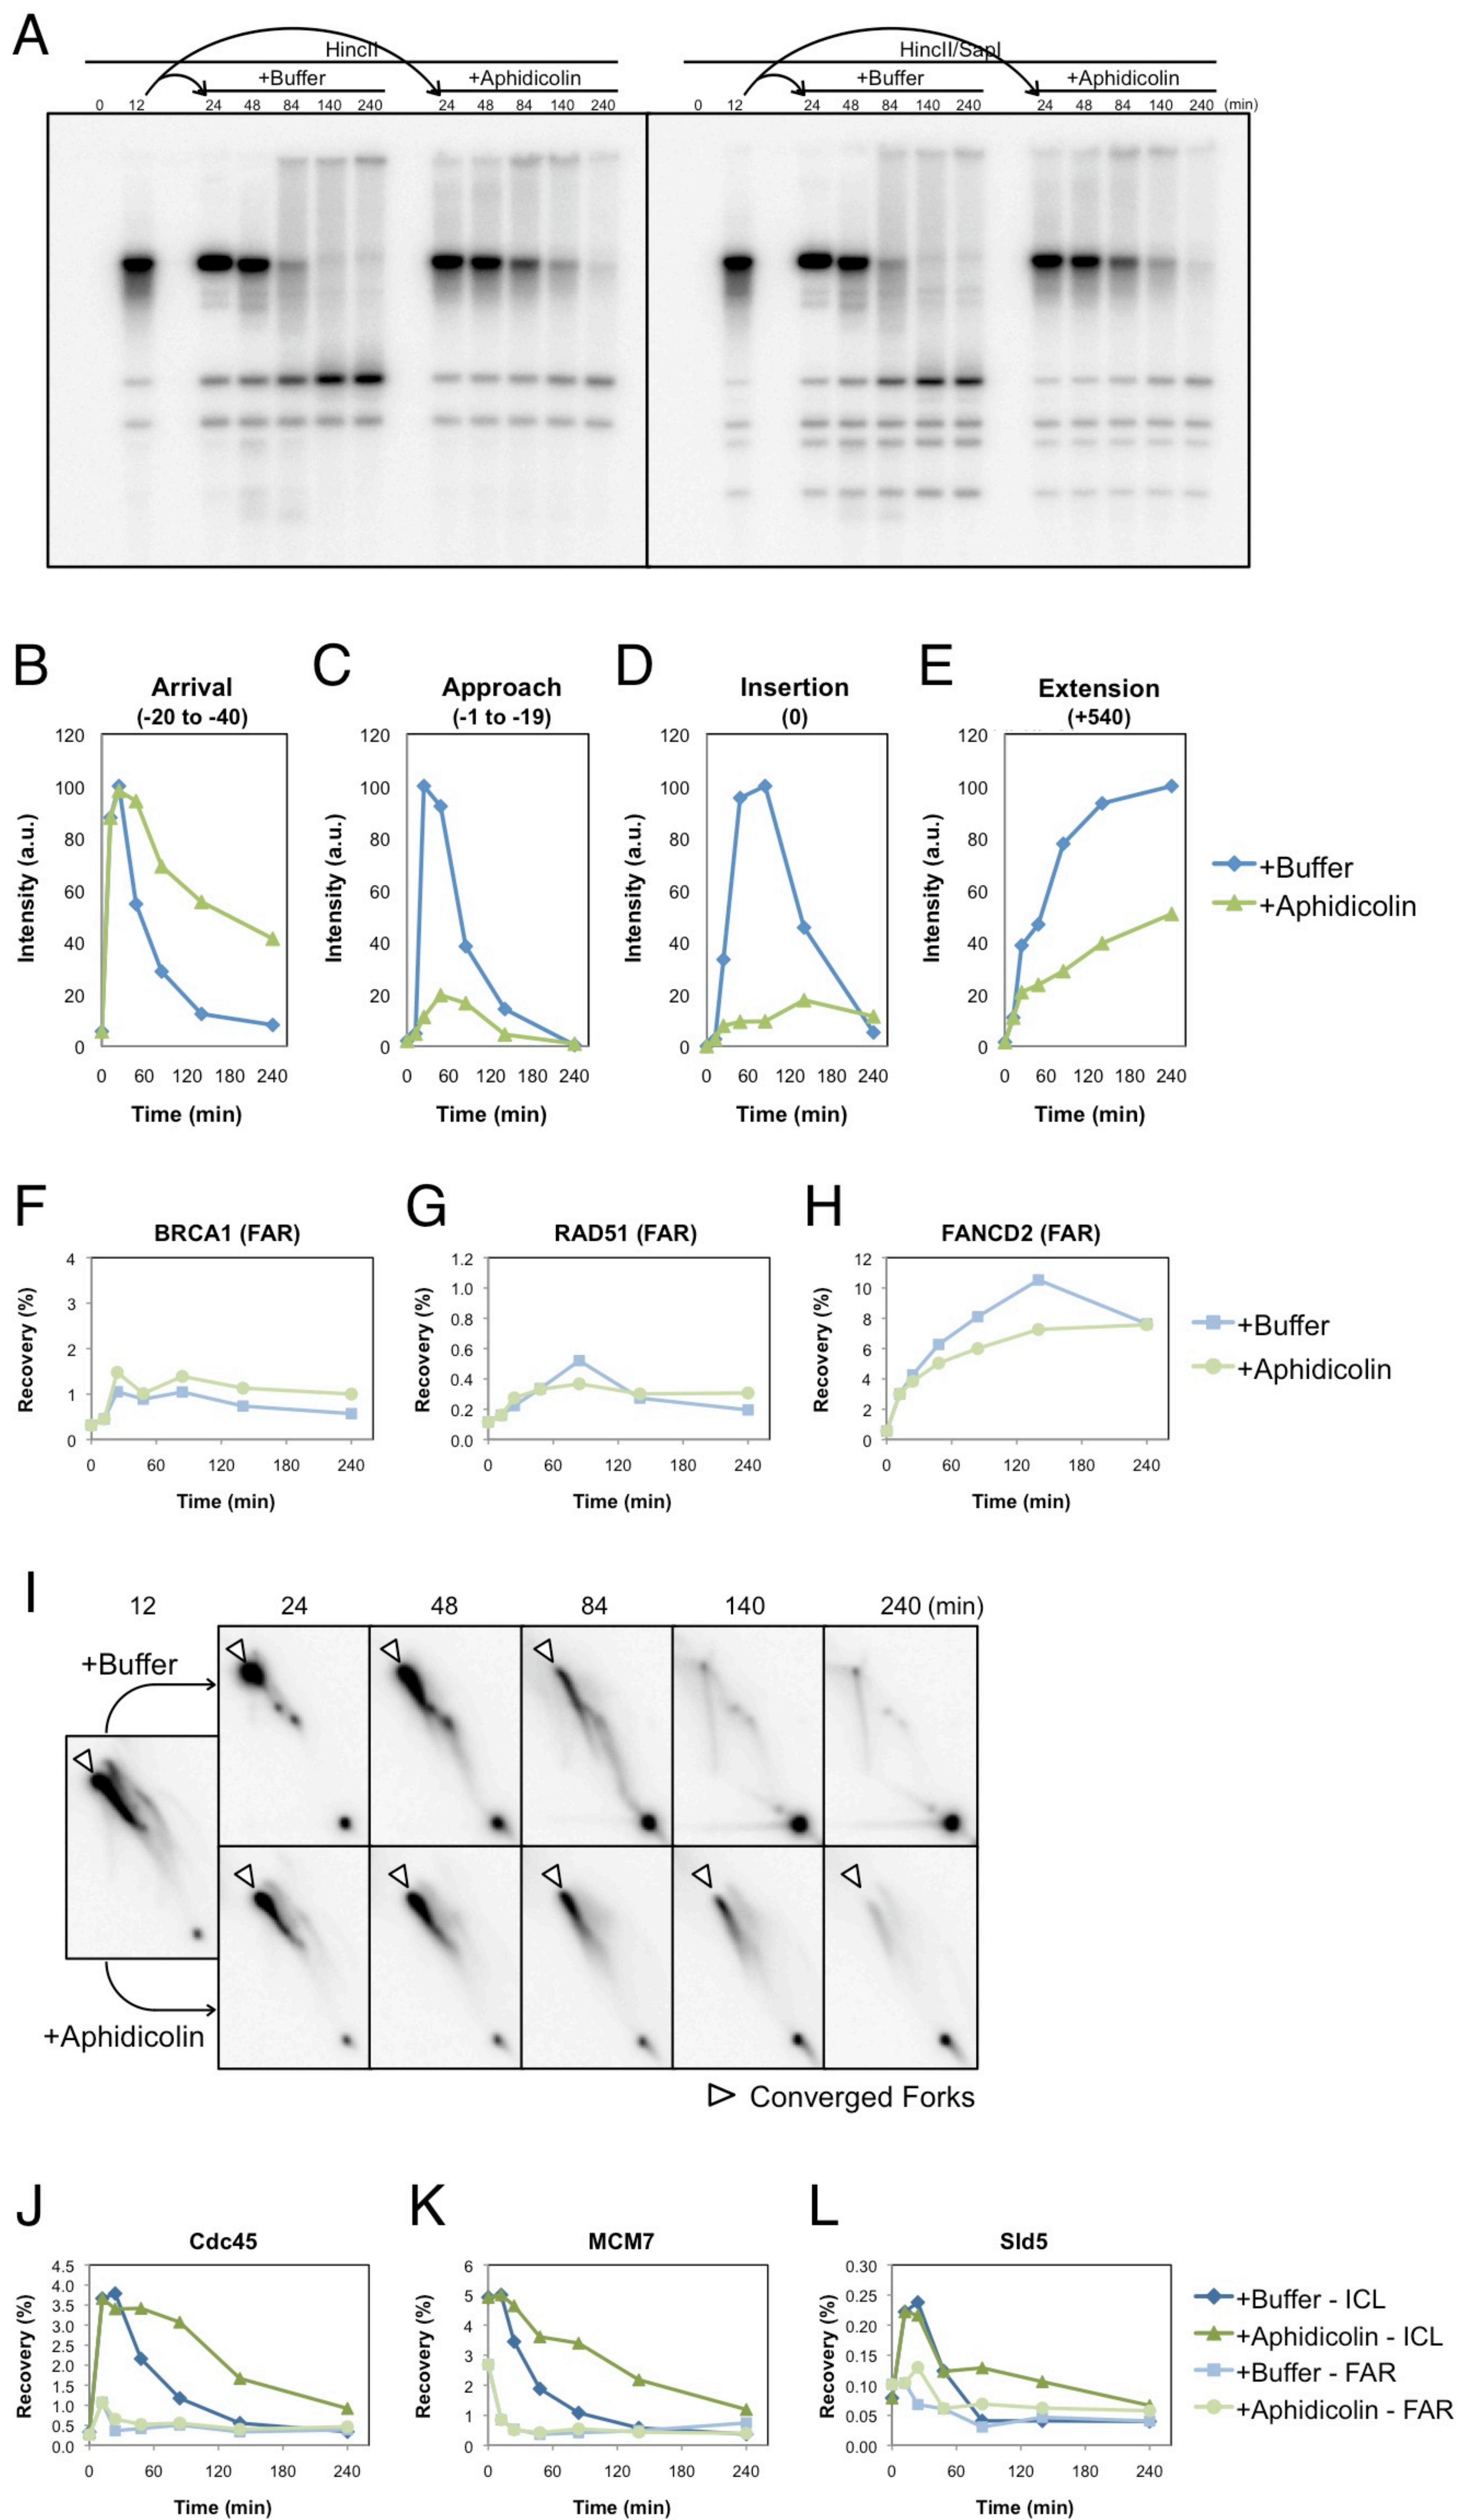



# Figure S6

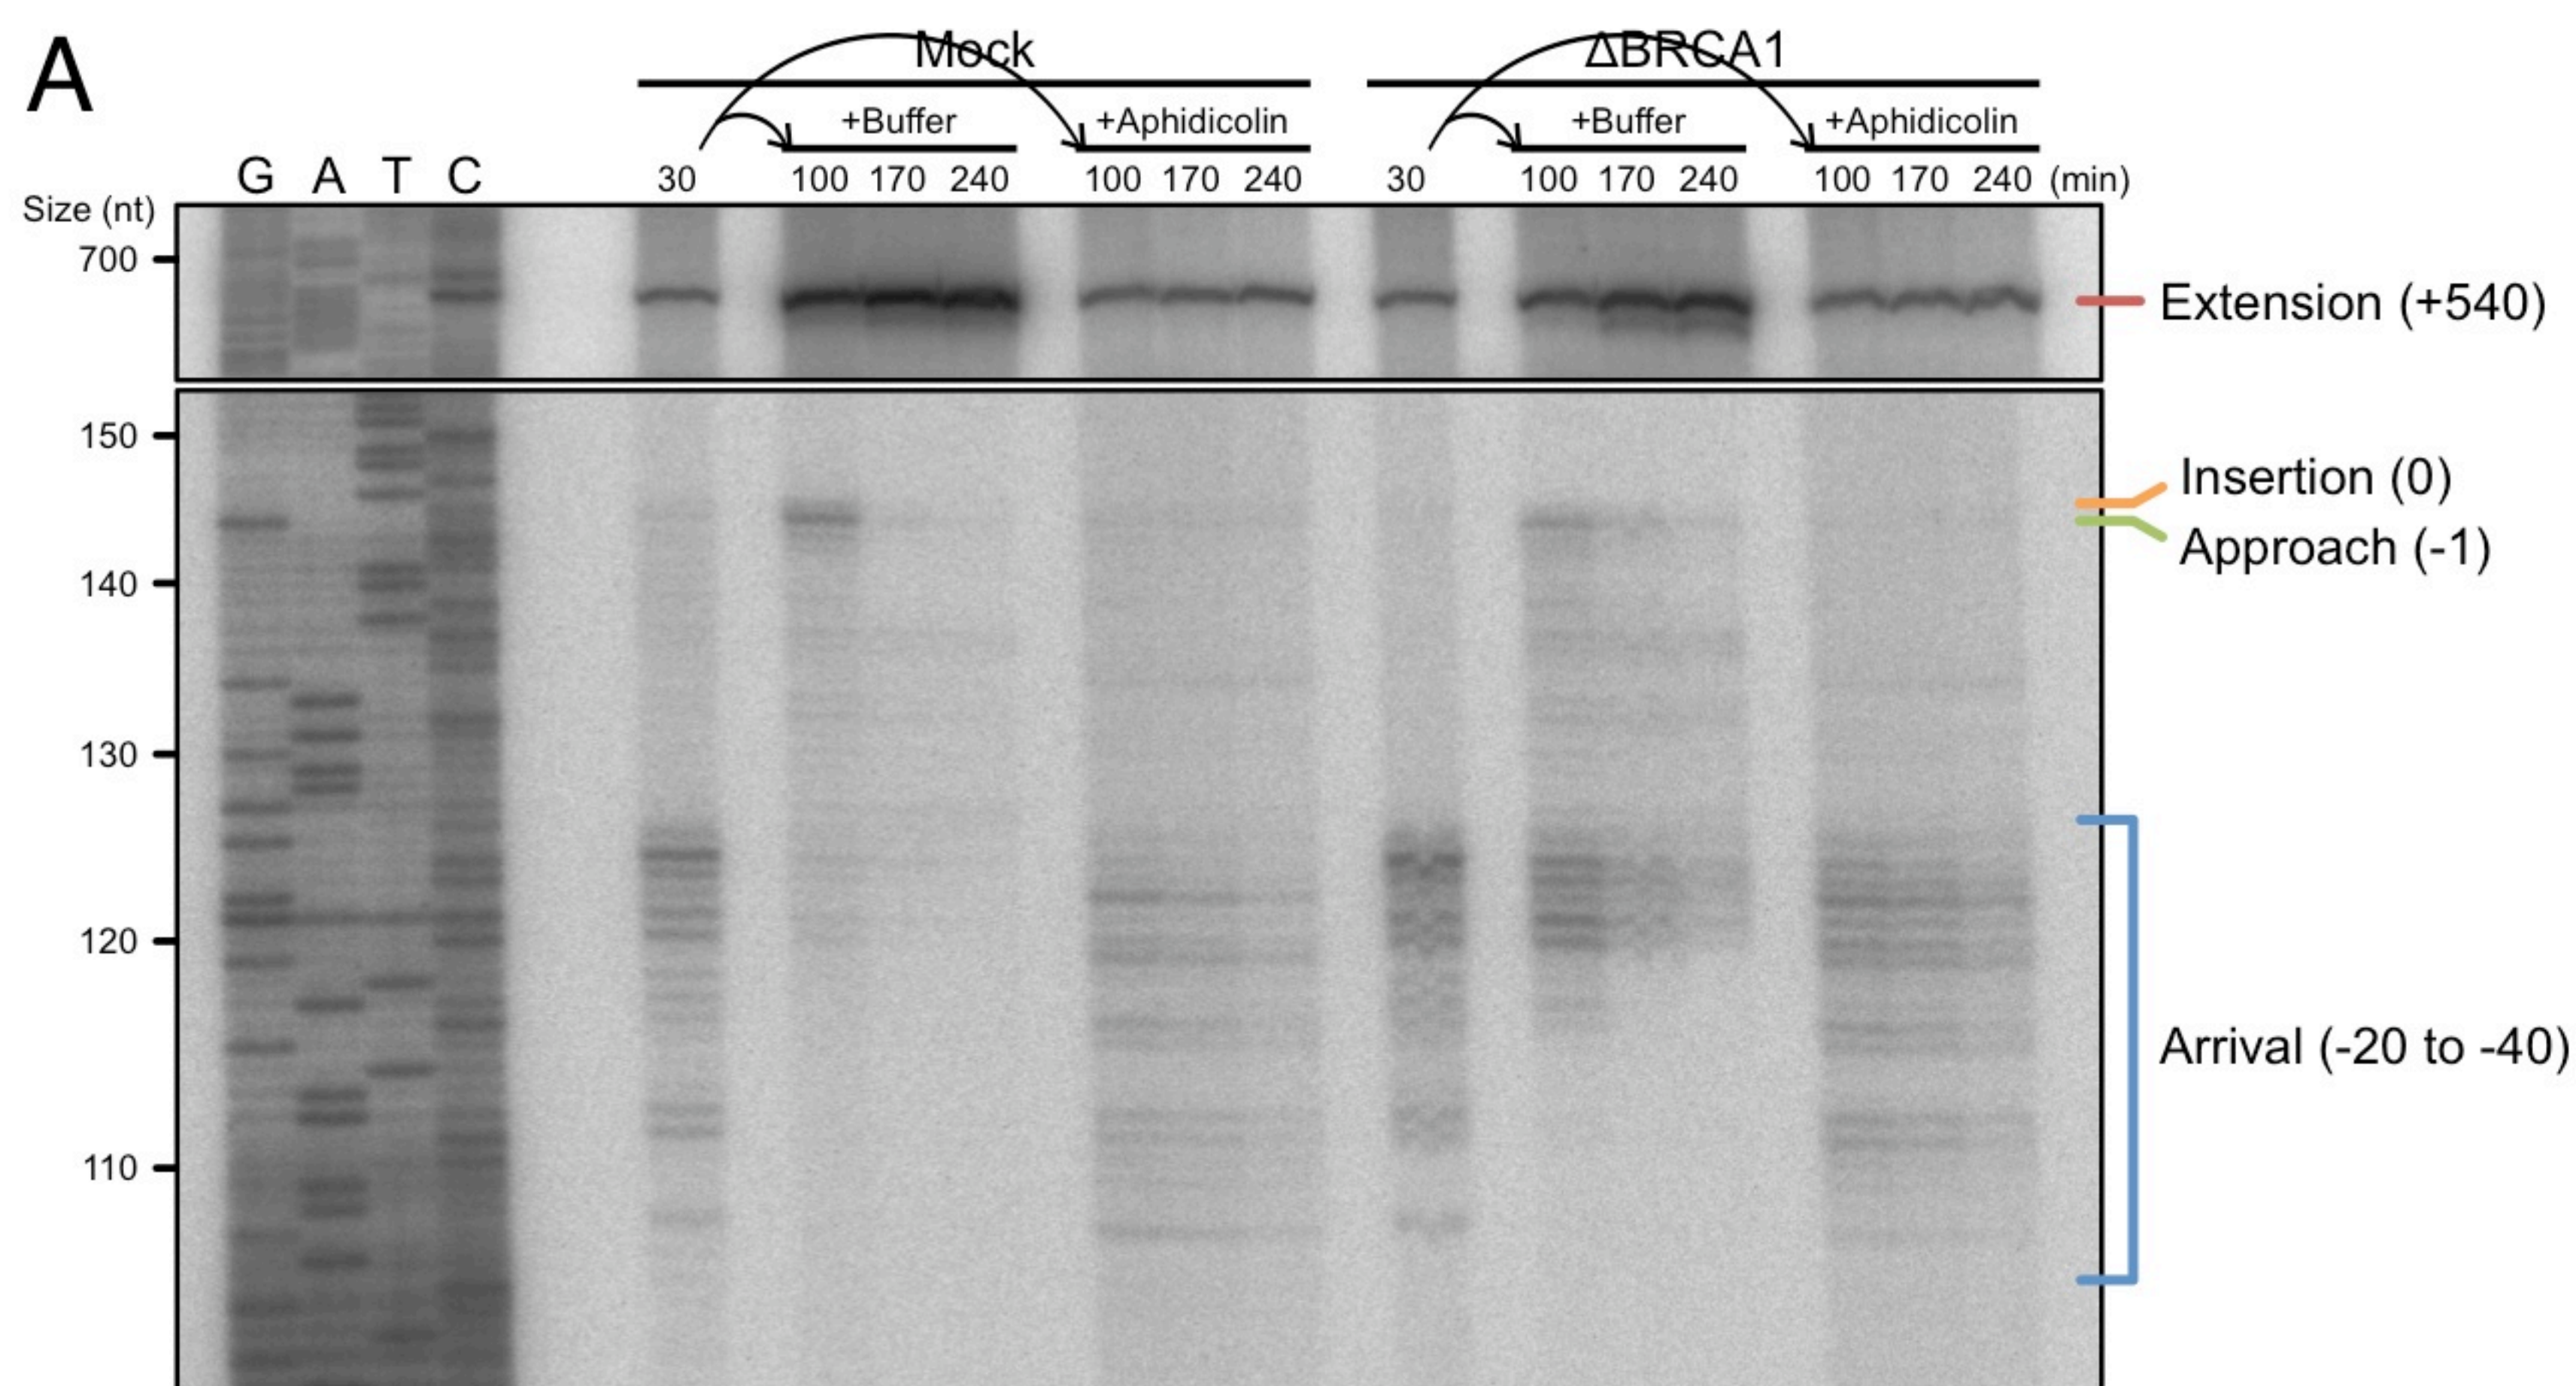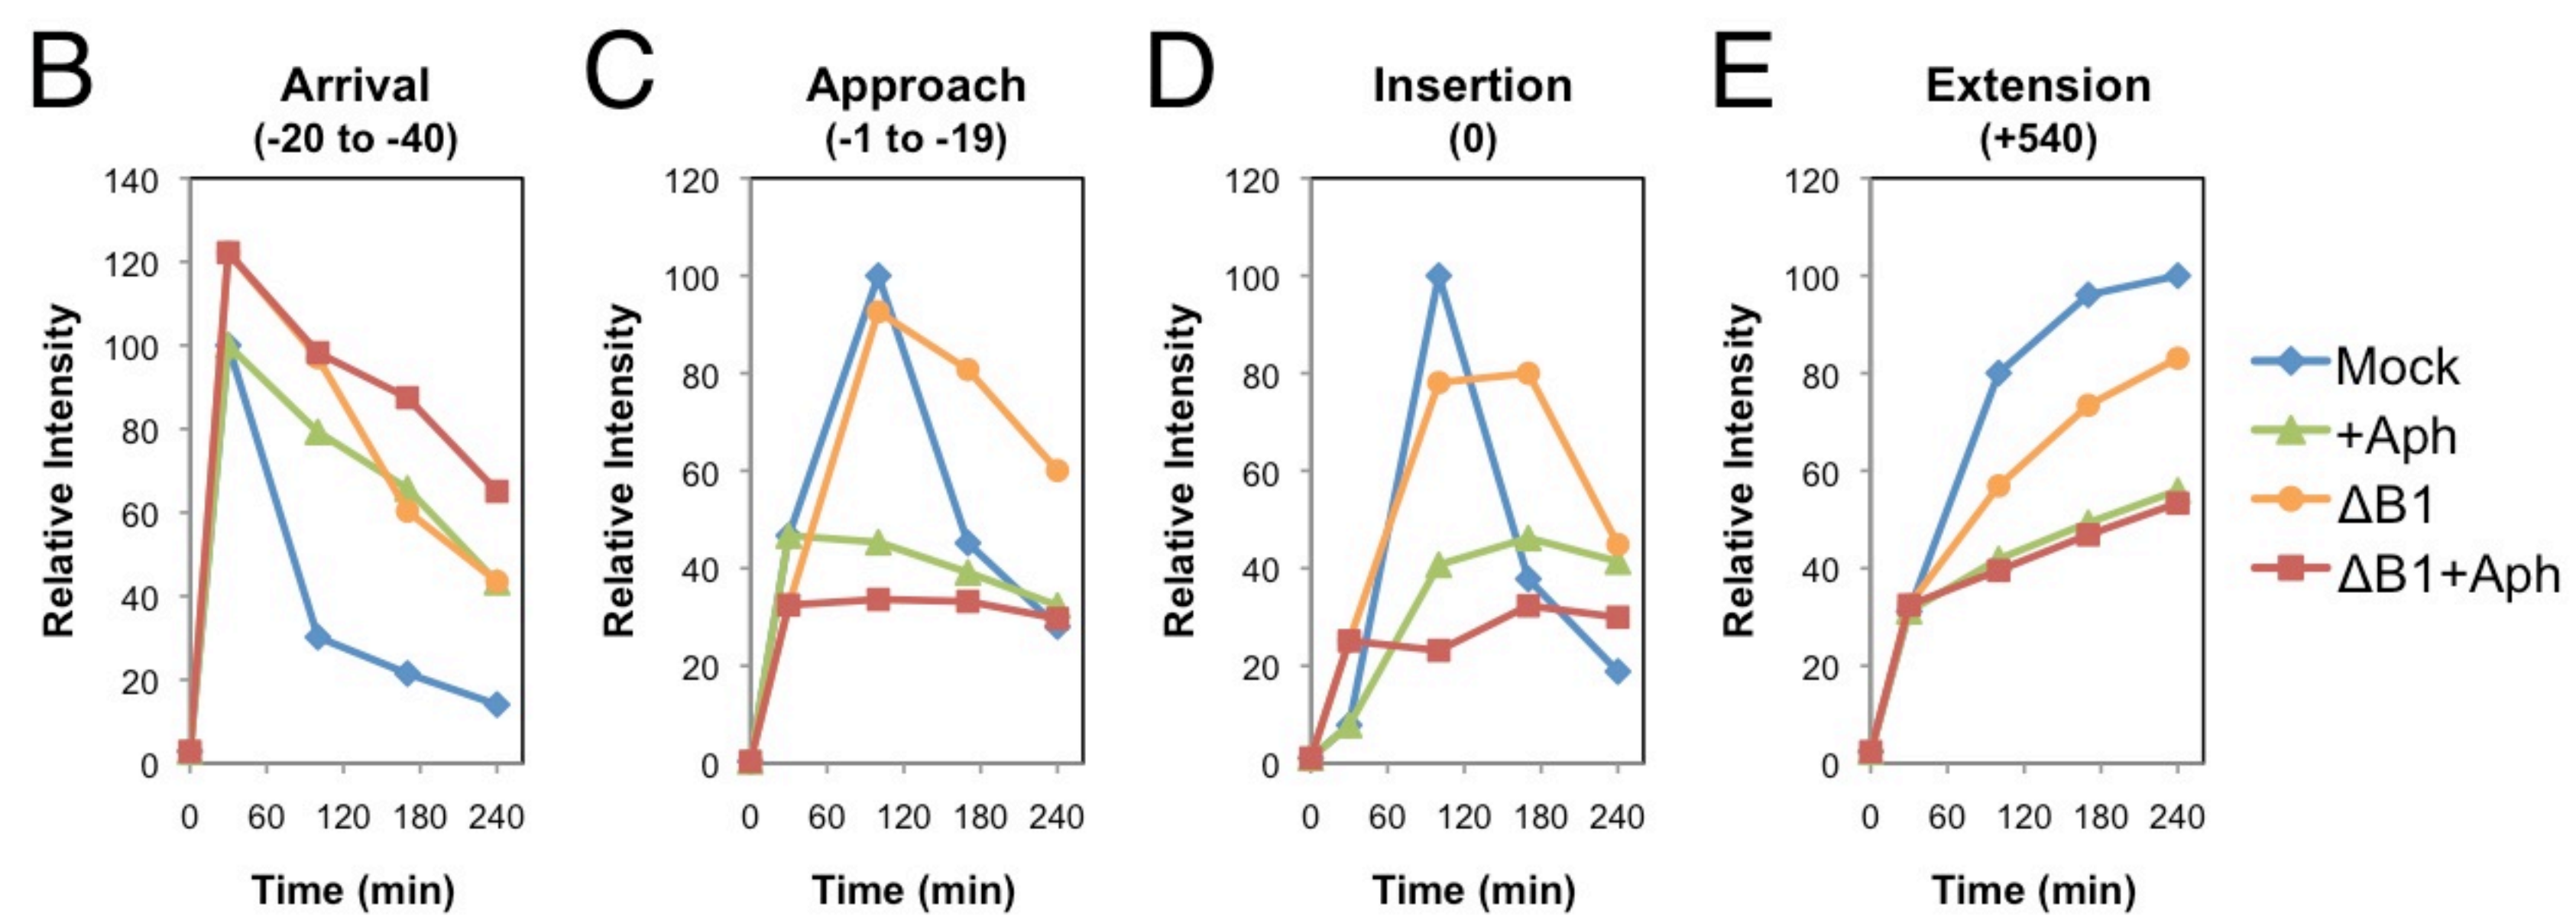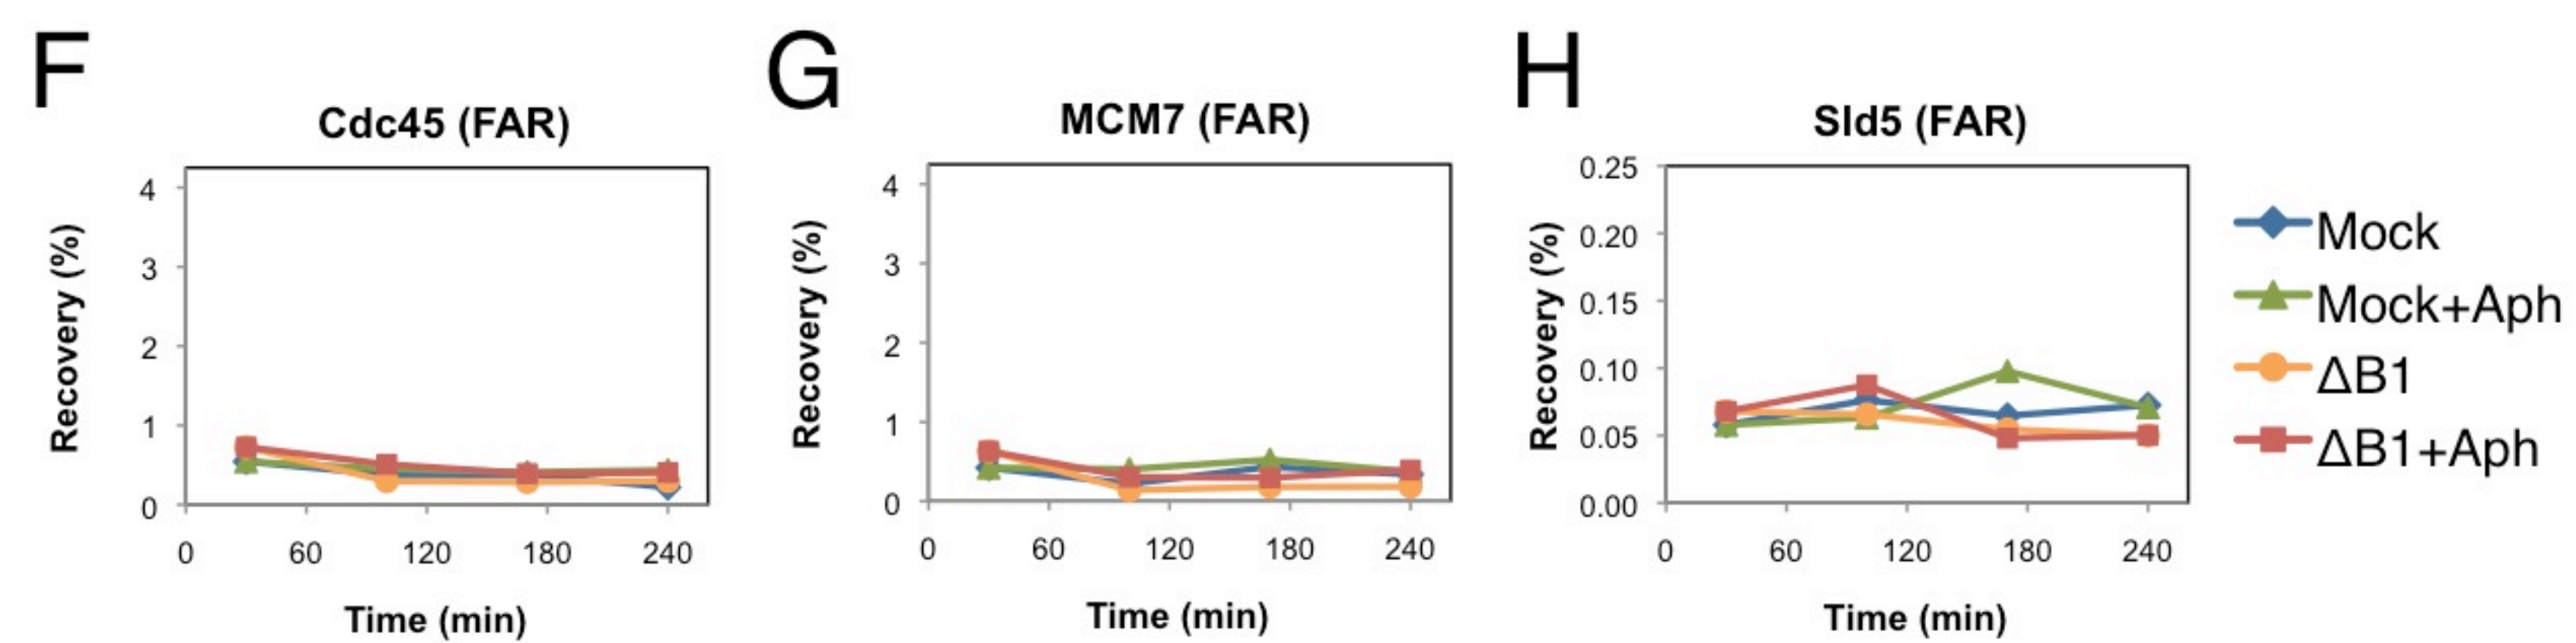



# Figure S7

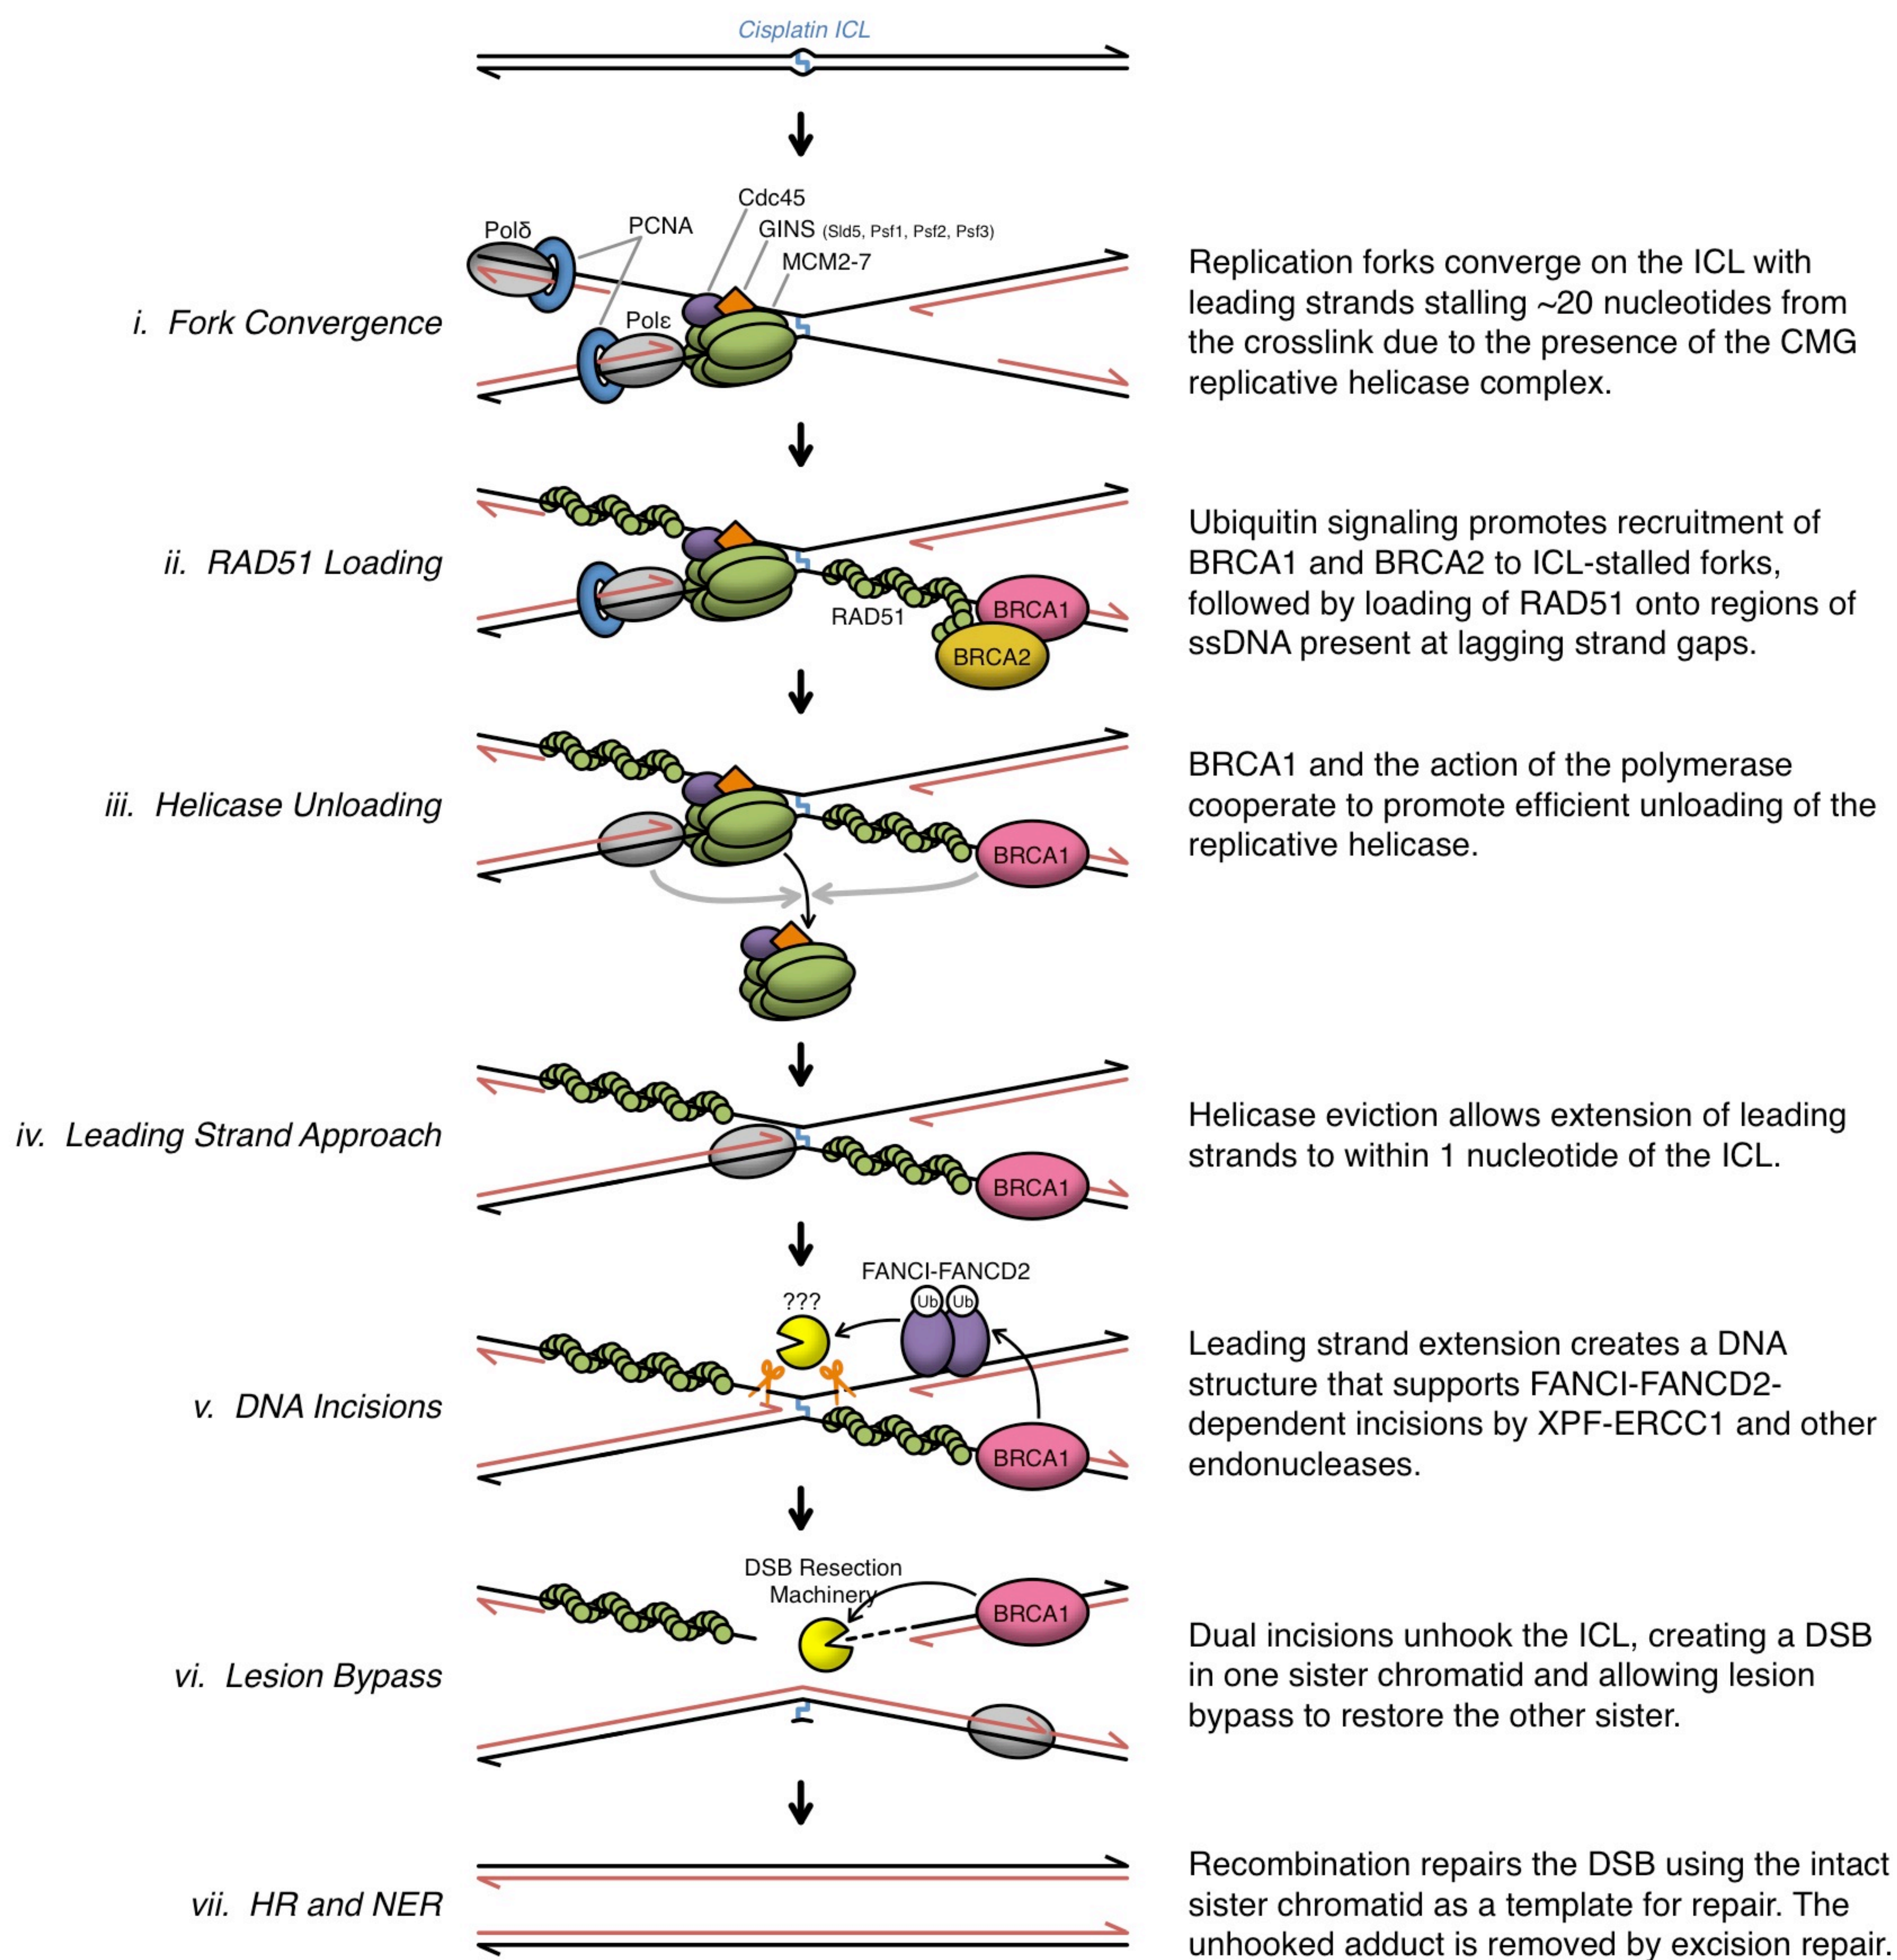



## ***Supplemental Figure Legends***

**Figure S1, related to Figure 2.** (A) Samples from the reaction presented in Figure 2 were analyzed by Western blot with the indicated antibodies and quantified for (B) FANCD2 ubiquitylation and (C) Chk1 phosphorylation. (D) Primary data from which DNA Synthesis and ICL Repair was calculated for Figures 2A and B, respectively (described in *Methods*). pICL was replicated in extract supplemented with buffer (+Buffer), UbVS (+UbVS), or UbVS and ubiquitin (+UbVS+Ub) and DNA intermediates were digested with HincII or HincII and SapI. Samples were then separated by native agarose gel electrophoresis and visualized by phosphorimager. Intermediates used for quantification are indicated at right. (E-J) ChIP data from Figures 2C-E and 2H-J are shown with percent recovery values at the FAR locus. (K-N) Quantification of nascent strand products from Figure 2G (solid lines) is shown with two experimental replicates (dashed and dotted lines). Arrival (-20 to -40 position), Approach (-1 to -19), Insertion (0), Extension (+540). The abundance of each product is normalized to peak values in +Buffer samples. (O-Q) ChIP data from Figure 2H-J (solid lines) is shown with experimental replicates (dashed and dotted lines). Three replicates are shown for Cdc45 and two for MCM7 and Sld5.

**Figure S2, related to Figure 3.** (A) Western blot analysis of mock-depleted (Mock) and BRCA1-depleted ( $\Delta$ B1) extracts. Relative protein levels in BRCA1-depleted extracts were determined by comparison with a dilution series of mock-depleted extract and indicated as a percentage in the figure. (B) Primary data from which Converged Forks accumulation was calculated for Figures 3A and B. pICL was replicated in extract supplemented with radioactive nucleotide to label nascent strands. Uncut DNA intermediates were separated by native agarose gel electrophoresis and visualized by phosphorimager. The radioactivity in the bands



encompassed by the bracket, which represent intact forks that have undergone varying degrees of resection, was quantified and graphed in Figures 3A and B. (C) Primary data from which DNA Synthesis and ICL Repair was calculated for Figures 3E and F, as in Figure S1. (D and E) ICL Repair data from two additional BRCA1 depletion experiments (#2 and #3, respectively). (F-N) ChIP data from Figure 3A-C are shown with percent recovery values for both ICL and FAR loci. (O-R) ChIP data from Figure 3G-J are shown with percent recovery values at the FAR locus.

**Figure S3, related to Figure 5.** (A) For the mock-depleted reaction from Figure 3, Arrival and Approach products (from *H* and *I*) were graphed relative to BRCA1 recruitment at the ICL as measured by ChIP (from Figure 3G). Mock- and BRCA1-depleted samples from Figure 3 were also used to analyze recruitment (by ChIP) of (B) Cdc45, (C) MCM7, and (D) Sld5 to an undamaged plasmid included in the replication reaction (pQuant, see *Methods*). (E) Pre-immune (Mock), BRCA1, or BARD1 antibodies were immobilized on protein A sepharose beads, then incubated with extract (input; IN). Beads were then pulled down and the supernatant (S) and pellet (P) fractions were blotted with the indicated antibodies. (F) Buffer, or the indicated BARD1 RING peptides were immobilized on glutathione sepharose beads, then incubated with extract, pulled down, and blotted as in (E). Unlike the BRCA1 and BARD1 antibodies, which quantitatively precipitated both BRCA1 and BARD1, the RING<sup>WT</sup> peptide recovered only BRCA1, indicating that BARD1 was displaced from the complex. (G-J) Quantification of nascent strand products from Figure 5A (solid lines) is shown with two experimental replicates (dashed and dotted lines). The abundance of products at each time point is normalized to peak values in mock-depleted samples. (K-M) ChIP data from Figure 5B-D are shown with percent recovery values at the FAR locus. (N-P) ChIP data from Figure 5B-D (solid lines) are shown with two experimental replicates (dashed and dotted lines).



**Figure S4, related to Figure 6.** (A) Western blot analysis of mock-depleted (Mock) and partially BRCA1-depleted ( $\Delta B1$ ) extracts. The relative protein level was determined by comparison with a dilution series of mock-depleted extract. (B-E) Quantification of nascent strand products from Figure 6A (solid lines) is shown with two experimental replicates (dashed and dotted lines). The abundance of each product is normalized to peak values in +Buffer samples. (F-H) ChIP data from Figure 6B-D are shown with percent recovery values at the FAR locus. (I-K) ChIP data from Figure 6B-D (solid lines) are shown with an experimental replicate (dashed lines). pICL was replicated in egg extract for 18 minutes, then supplemented with buffer (+Buffer), phosphorylated SXXF peptide (+pSPTF), or non-phosphorylated SXXF peptide (+SPTF). At the indicated times, samples were then analyzed by denaturing polyacrylamide gel electrophoresis (L; irrelevant lanes removed between lanes 15 and 16) with strand products quantified in (M-P), and by ChIP with the indicated antibodies (Q-S).

**Figure S5, related to Figure 7.** (A) Primary data from which DNA replication (Figure 7B) and ICL repair (Figure 7G) were calculated. (B-E) Quantification of nascent strand products from Figure 7A. The abundance of products at each time point is normalized to peak values in +Buffer samples. (F-H) ChIP data from Figure 7C-E are shown with percent recovery values at the FAR locus. (I) Primary data from which Converged Forks accumulation (open arrowhead) was calculated (Figure 7F). (J-L) Samples from Figure 7A-G were analyzed by ChIP with the indicated antibodies at the ICL and FAR loci.

**Figure S6, related to Figure 7.** Primary data related to Figure 7H-J. (A) Nascent strand product formation in mock-depleted (Mock) and BRCA1-depleted ( $\Delta BRCA1$ ) extract supplemented with Buffer or Aphidicolin after 30 minutes. (B-E) Quantification of nascent strand products from A.



The abundance of products at each time point is normalized to peak values in the Mock+Buffer samples. (F-H) ChIP data showing Cdc45, MCM7, and Sld5 recovery at the FAR locus.

**Figure S7, related to Figure 1.** Schematic model of ICL repair in *Xenopus laevis* egg extracts. Parental DNA (black lines), nascent strands (red lines). HR (homologous recombination), DSB (double-strand break).
